# Supplementary material for: Co-Existence of Atomic Pt and CoPt Nanoclusters on Co/SnOx Mix-Oxide Demonstrates an Ultra-High-Performance Oxygen Reduction Reaction Activity
Source: MDPI journal article supplement (doi:10.3390/nano12162824), 2022-08-17
Supplement: s1 [file s1]

# **Co-Existence of Atomic Pt and CoPt Nanoclusters on Co/SnO<sub>x</sub> Mix-Oxide Demonstrates an Ultra-High-Performance Oxygen Reduction Reaction Activity**

**Amisha Beniwal<sup>1</sup>, Dinesh Bhalothia<sup>1</sup>, Wei Yeh<sup>1</sup>, Mingxing Cheng<sup>1</sup>, Che Yan<sup>1</sup>, Po-Chun Chen<sup>2</sup>, Kuan-Wen Wang<sup>3</sup> and Tsan-Yao Chen<sup>1,4,\*</sup>**

<sup>1</sup> Department of Engineering and System Science, National Tsing Hua University, Hsinchu 30013, Taiwan

<sup>2</sup> Department of Materials and Mineral Resources Engineering, National Taipei University of Technology, Taipei 10608, Taiwan

<sup>3</sup> Institute of Materials Science and Engineering, National Central University, Taoyuan City 32001, Taiwan

<sup>4</sup> Hierarchical Green-Energy Materials (Hi-GEM) Research Centre, National Cheng Kung University, Tainan 70101, Taiwan

\* Correspondence: [chencaeser@gmail.com](mailto:chencaeser@gmail.com); Tel.: +886-3-5715131 (ext. 34271); Fax: +886-3-5720724

## 1. ICP-OES results of CSPP NC.

**Table S1.** The ICP-OES determined actual composition of CSPP NCs.

| Sample        | Composition (%) |       |       |       |
|---------------|-----------------|-------|-------|-------|
|               | Co              | Sn    | Pd    | Pt    |
| CSPP-RT/50/70 | 2.747           | 6.095 | 5.472 | 0.329 |

- The composition is same for all the CSPP NCs.

## 2. HRTEM Image of CSP Nanocatalyst.

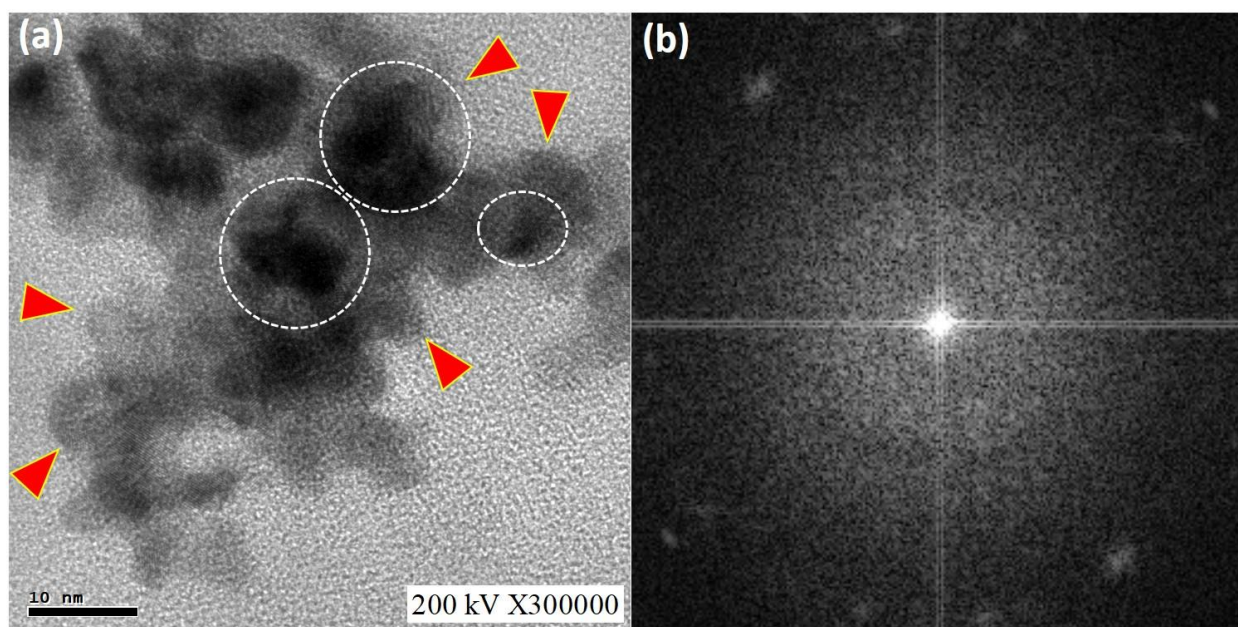

**Figure S1.** (a) The HRTEM image and (b) corresponding FFT pattern of CSP nanocatalyst.

### 3. The XRD Patterns of control samples.

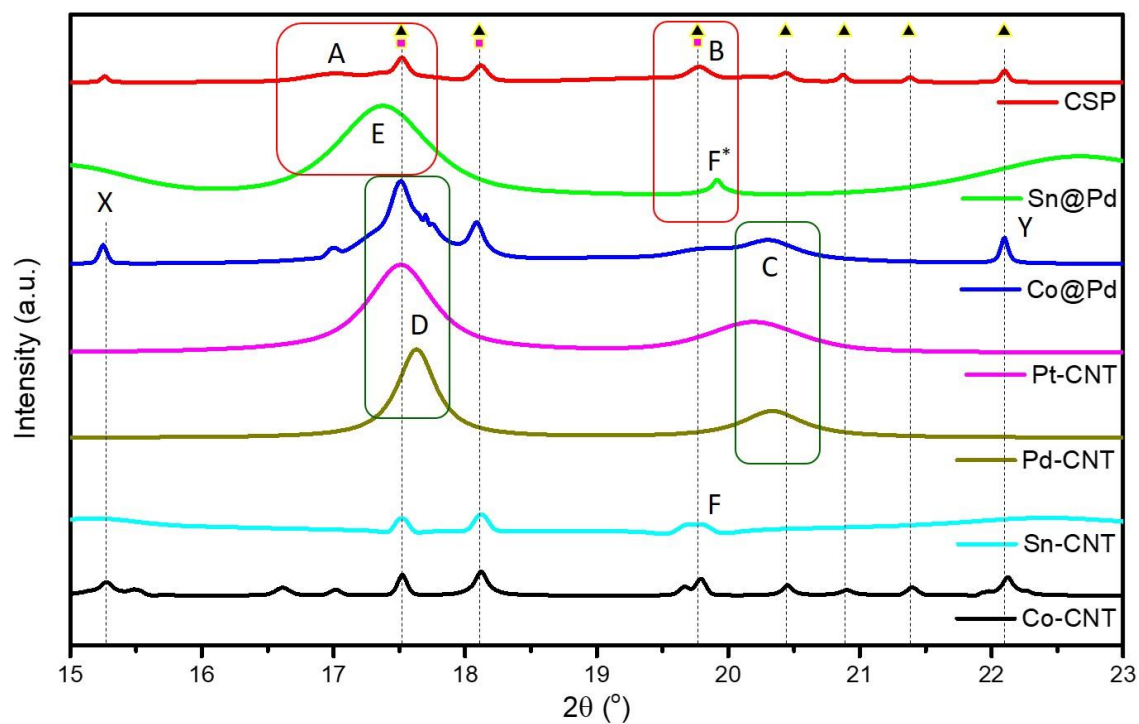

**Figure S2.** The XRD patterns of control samples.

**Table S2.** XRD determined average particle size of experimental NCs.

| Sample | Component              | $2\theta$ position ( $^{\circ}$ ) | FWHM  | Average size (nm) |
|--------|------------------------|-----------------------------------|-------|-------------------|
| Pd-CNT | Pd (111)               | 17.63                             | 0.511 | 6.94              |
| Pt-CNT | Pt (111)               | 17.50                             | 0.864 | 4.11              |
| Sn@Pd  | SnPd alloy             | 17.40                             | 1.040 | 3.41              |
| CSP-RT | SnO <sub>2</sub> phase | 17.53                             | 0.072 | 47.56             |
| CSP-50 | CoPt (110)             | 20.87                             | 0.070 | 50.96             |
|        | CoPt (002)             | 21.05                             | 0.090 | 39.65             |
|        | SnO <sub>2</sub> phase | 17.49                             | 0.084 | 42.26             |
| CSP-70 | SnO <sub>2</sub> phase | 15.54                             | 0.071 | 47.96             |

#### 4. Electrochemical parameters of experimental NCs

**Table S3.** Electrochemical parameters of experimental NCs

| Sample  | N (0.5 V) | ECSA<br>( $\text{cm}^2 \text{mg}_{\text{Pd+Pt}}^{-1}$ ) | $V_{\text{oc}}$ (V) | $E_{1/2}$ (V) | $J_{\text{K}^0}$ (0.85 V) | $J_{\text{K}^c}$ (0.85 V) | M.A. $\text{Pt/Pd}$<br>(0.85V)<br>(mA/mg) | S.A. <sub>(0.85V)</sub><br>(mA $\text{cm}^{-2}$ ) |
|---------|-----------|---------------------------------------------------------|---------------------|---------------|---------------------------|---------------------------|-------------------------------------------|---------------------------------------------------|
| CSP     | 3.24      |                                                         | 0.896               | 0.834         | 1.95                      | 1.95                      | 36.30                                     |                                                   |
| CSPP-RT | 4.39      | 111.6                                                   | 0.913               | 0.867         | 5.23                      | 3.28                      | 1669                                      | 0.523                                             |
| CSPP-50 | 3.85      | 110                                                     | 0.946               | 0.894         | 10.46                     | 8.51                      | 4330                                      | 1.045                                             |
| CSPP-75 | 3.21      | 97.7                                                    | 0.860               | 0.810         | 1.55                      | N/A                       | N/A                                       | 0.219                                             |

\* For CSPP NCs,  $J_{\text{K}^c}$  (0.85 V) is calculated by deducing the contribution of the  $J_{\text{K}^0}$  (0.85 V) of CSP from that of CSPP NCs. The  $J_{\text{K}^c}$  (0.85 V) is used for calculating the mass activities of experimental NCs.

## 5. Electrochemical results of CSPP NCs compared with CSP NC

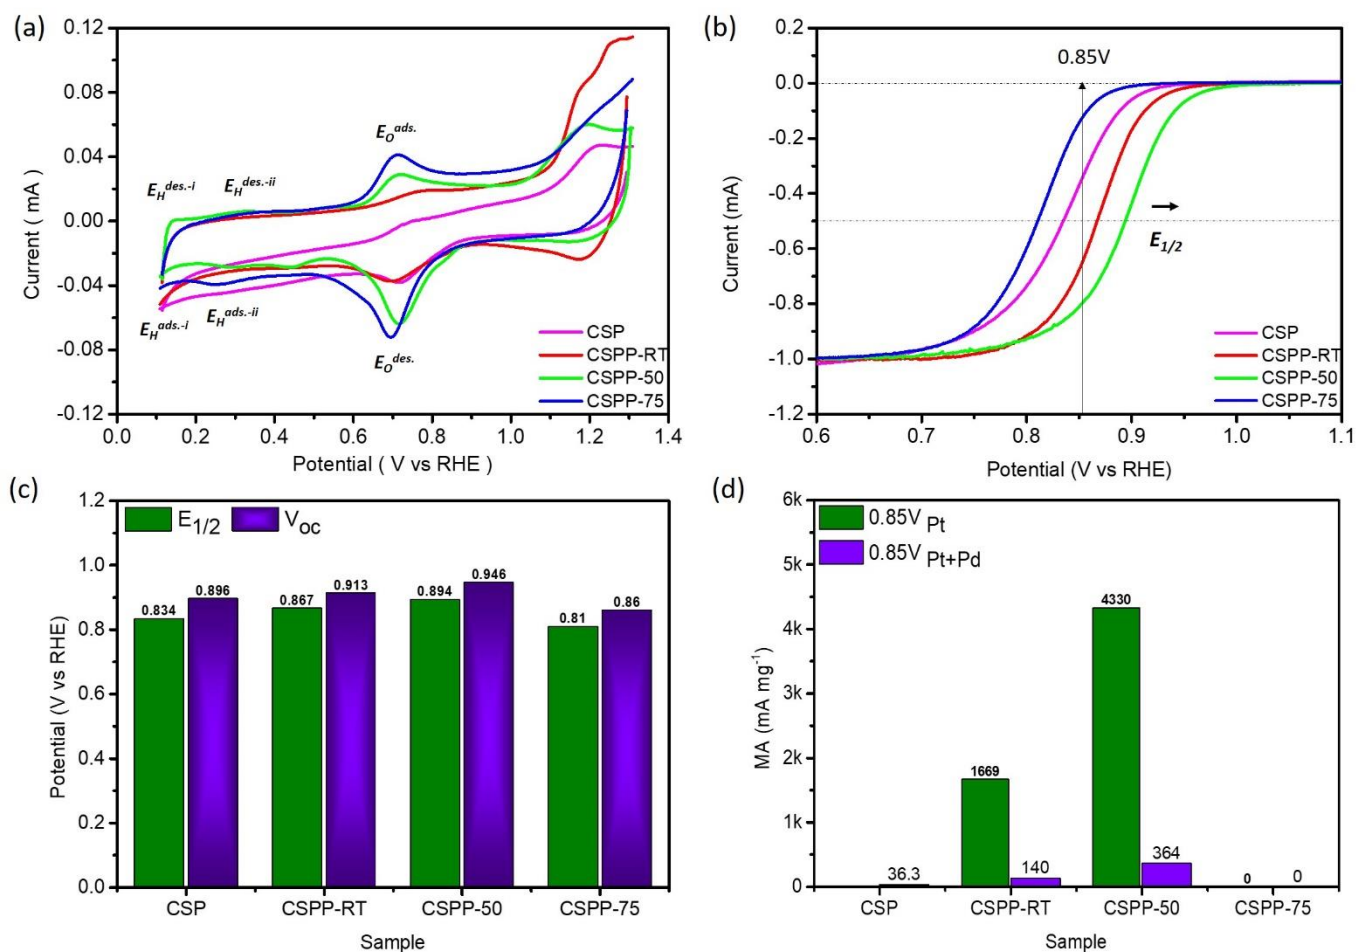

**Figure S3.** Electrochemical results of CSPP NCs compared with CSP NC. (a) CV and (b) LSV curves of CSPP-RT, CSPP-50 and CSPP-75 NCs compared with reference sample (CSP). (c) Onset potential ( $V_{oc}$ )/half wave potential ( $E_{1/2}$ ) and (d) ORR mass activity of CSPP NCs compared with commercial J.M.-Pt/C NCs.
